# Supplementary material for: Preparing Patients for Oral Immunotherapy (PPOINT): International Delphi consensus for procedural preparation and consent
Source: PubMed Central journal article supplement — J Allergy Clin Immunol. Author manuscript; Available in PMC 2024 Oct 9. (PMC11461787; doi:10.1016/j.jaci.2024.02.019), 2024-04-08

Theme J

**Patients may encounter the following difficulties, including psychological challenges during OIT**

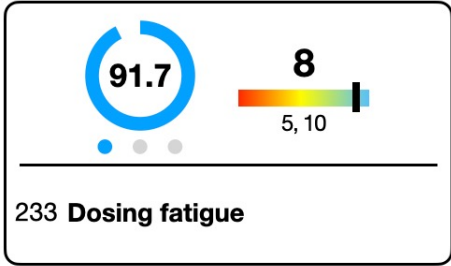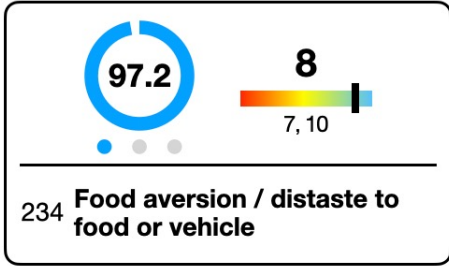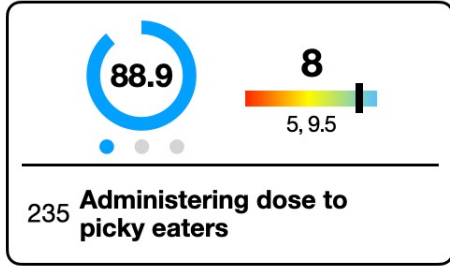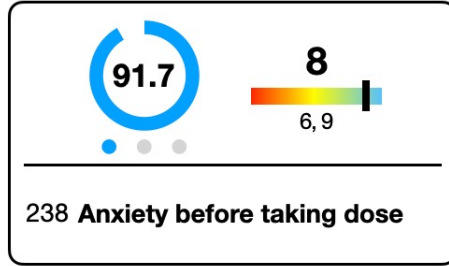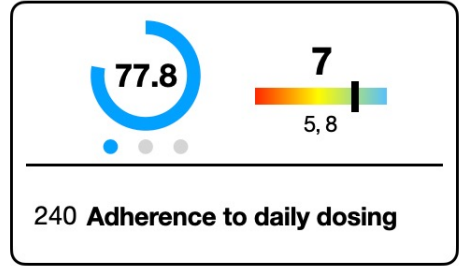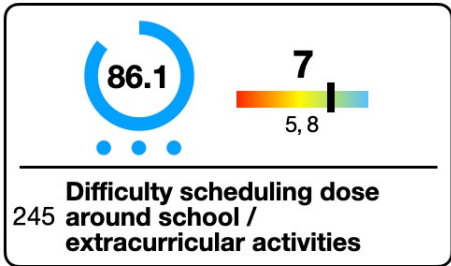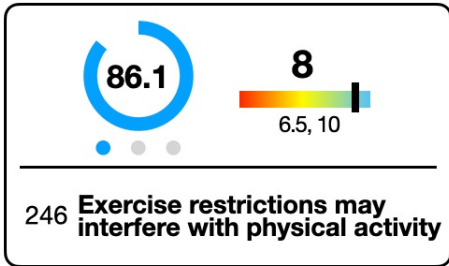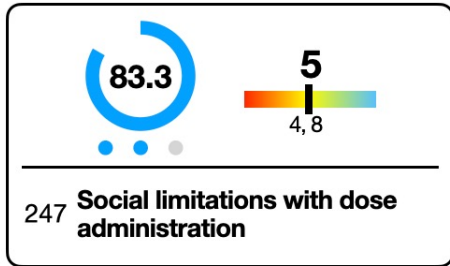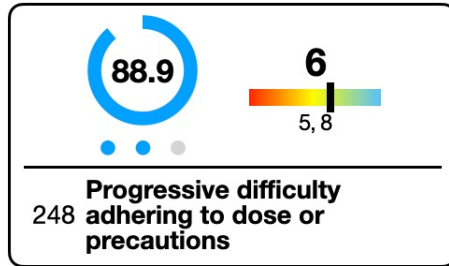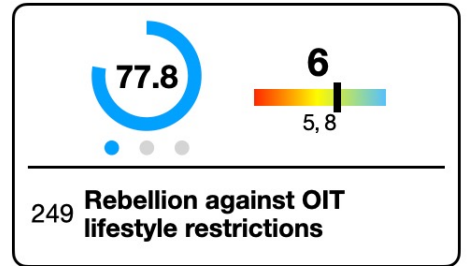

Supplement: NIHMS2025168-supplement-Theme_J.pdf [file NIHMS2025168-supplement-Theme_J.pdf]
