# Supplementary figures and images for: Preparing Patients for Oral Immunotherapy (PPOINT): International Delphi consensus for procedural preparation and consent
Source: PubMed Central journal article supplement — J Allergy Clin Immunol. Author manuscript; Available in PMC 2024 Oct 9. (PMC11461787; doi:10.1016/j.jaci.2024.02.019), 2024-04-08

Theme G

## The potential outcomes of OIT

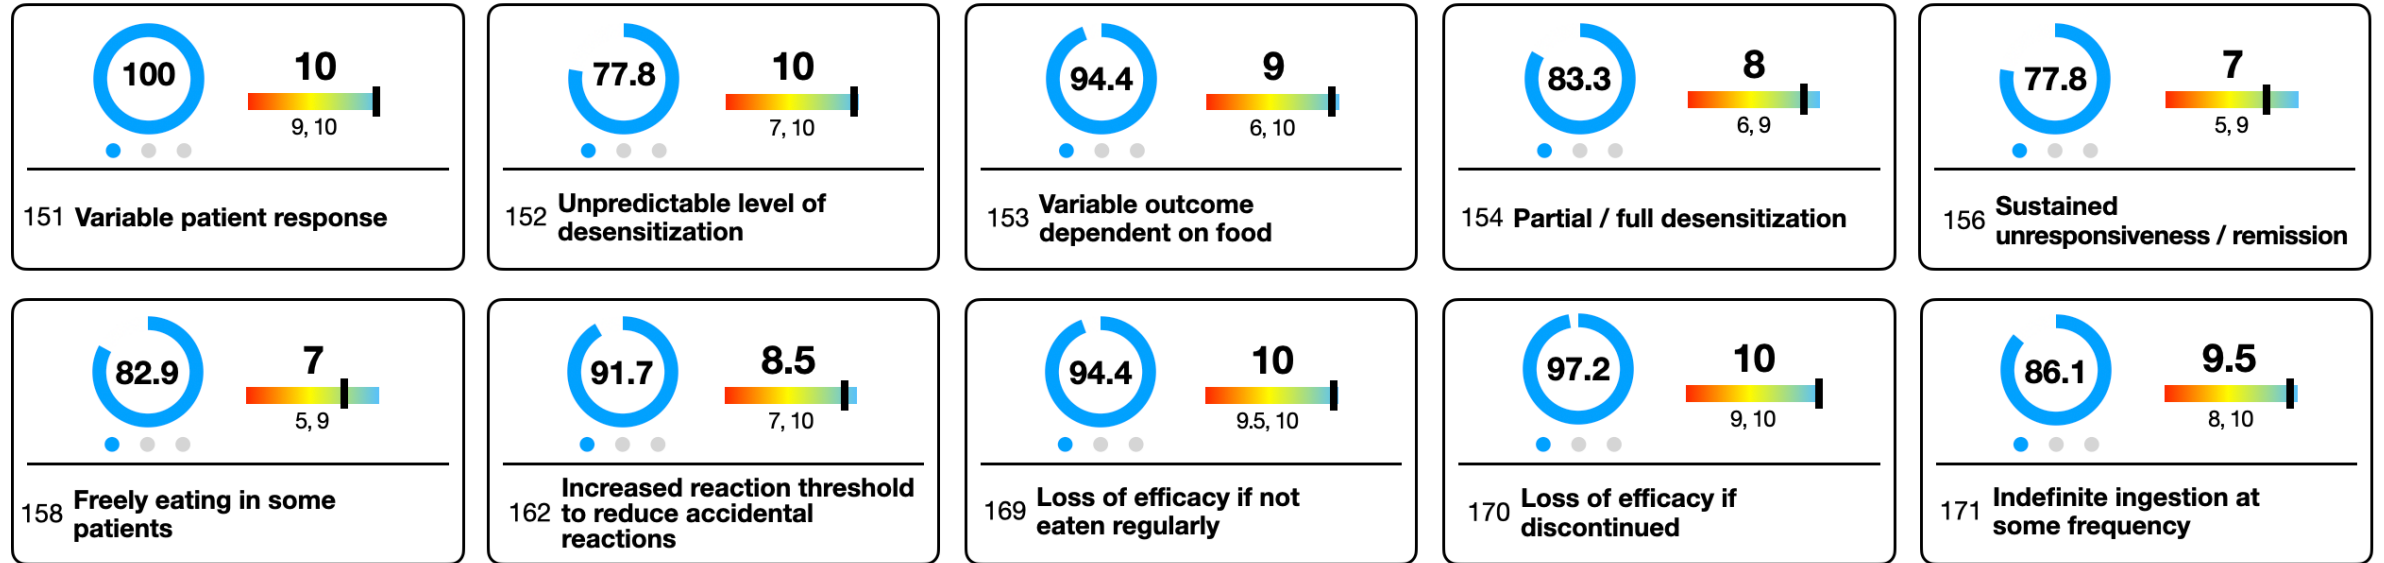

Supplement: NIHMS2025168-supplement-Theme_G.pdf [file NIHMS2025168-supplement-Theme_G.pdf]

Theme H

## The alternatives to OIT and the options for OIT

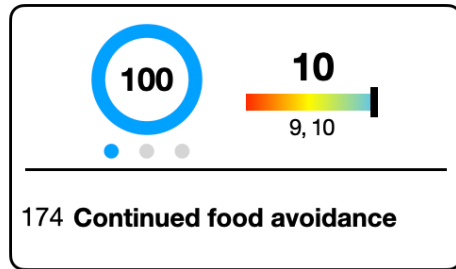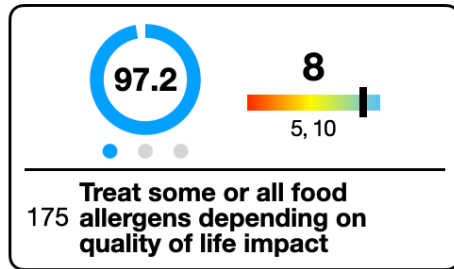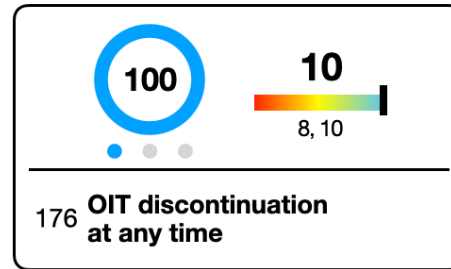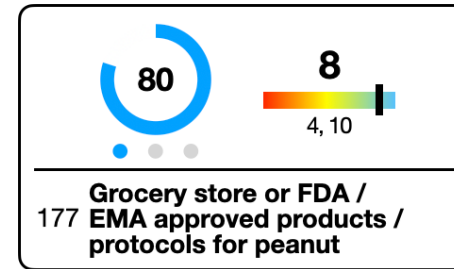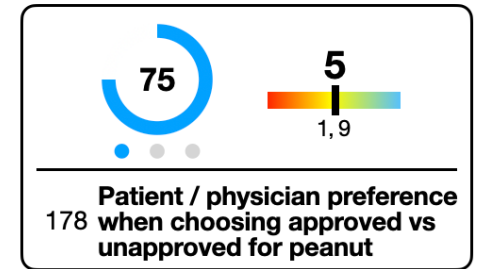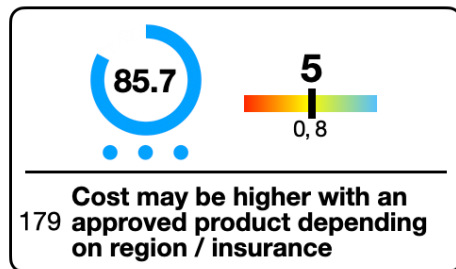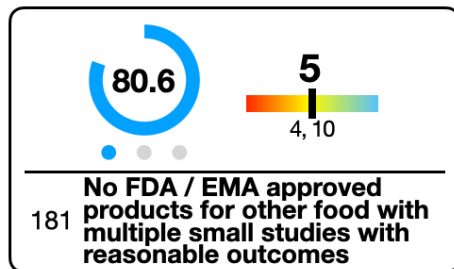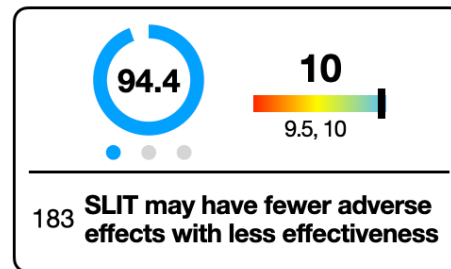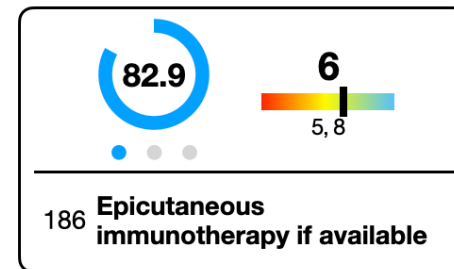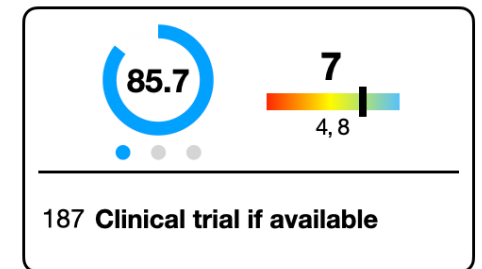

Supplement: NIHMS2025168-supplement-Theme_H.pdf [file NIHMS2025168-supplement-Theme_H.pdf]

Theme L

## Practical office-specific policies, protocols and procedures undertaken during OIT:

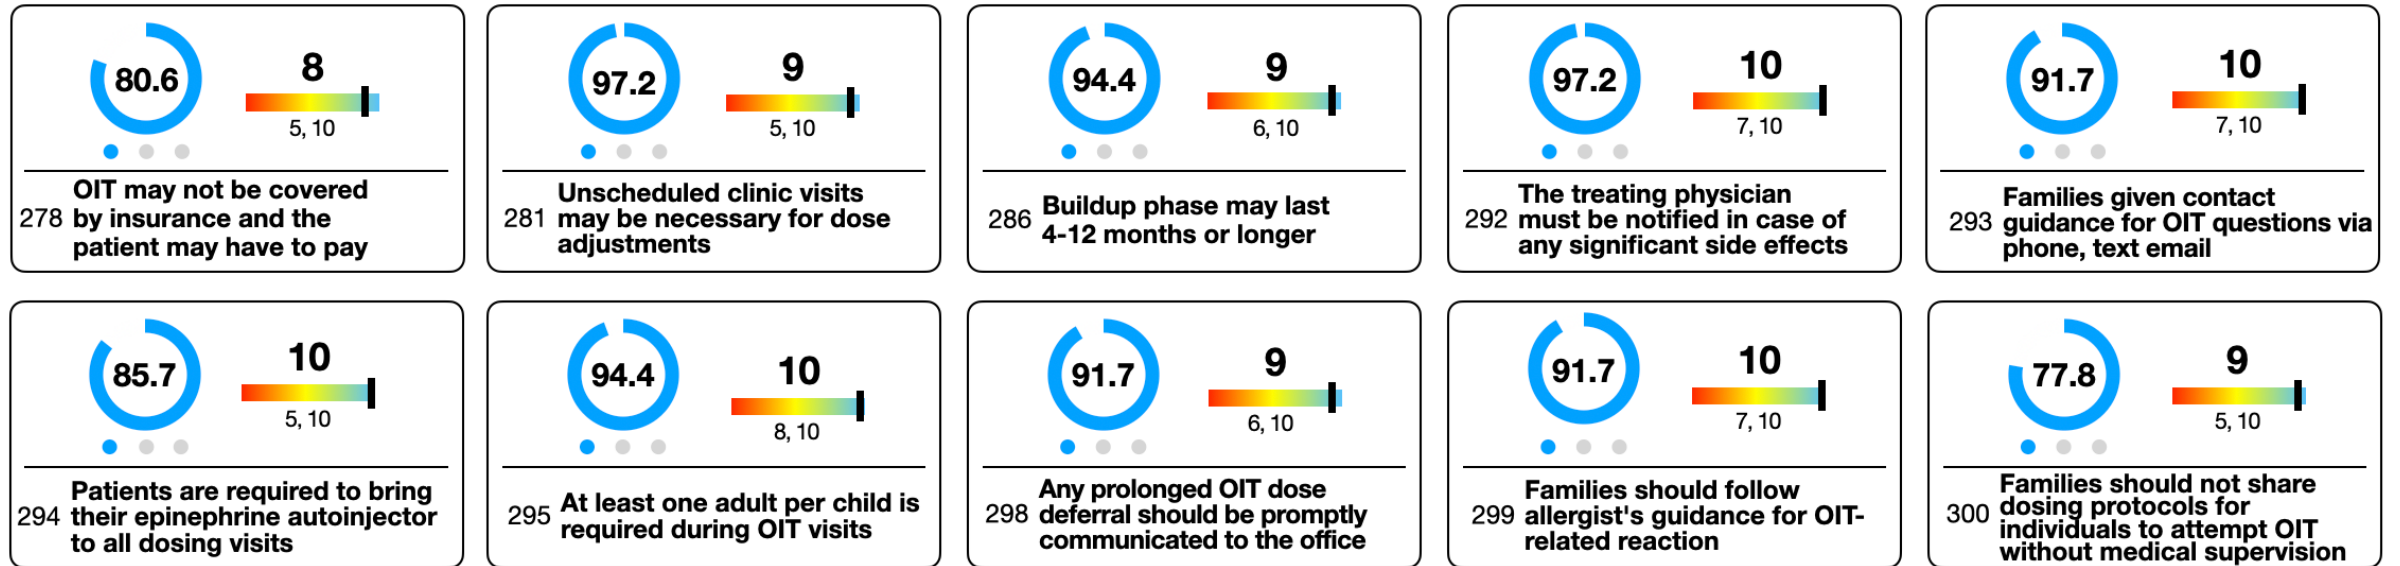

Supplement: NIHMS2025168-supplement-Theme_L.pdf [file NIHMS2025168-supplement-Theme_L.pdf]
